# Supplementary material
Source: PubMed Central journal article supplement (PMC164687)
Supplement: pnas_1232451100_1.pdf [file pnas_1232451100_1.pdf]

|                  | BbGL-I              | BbGL-I-Ac <sub>3</sub> | Cholesterol | BbGL-II                                   | BbGL-II-Ac <sub>4</sub>                   | MGDG                        | Palmitic acid | Oleic acid         | 1,2-Dipalmitin | Me- $\alpha$ -D-Galp (in D <sub>2</sub> O) | Me- $\beta$ -D-Galp (in D <sub>2</sub> O) |
|------------------|---------------------|------------------------|-------------|-------------------------------------------|-------------------------------------------|-----------------------------|---------------|--------------------|----------------|--------------------------------------------|-------------------------------------------|
| C-25             | 28.03               | 28.03                  | 28.02       |                                           |                                           |                             |               |                    |                |                                            |                                           |
| C-26             | 22.57               | 22.57                  | 22.57       |                                           |                                           |                             |               |                    |                |                                            |                                           |
| C-27             | 22.82               | 22.82                  | 22.81       |                                           |                                           |                             |               |                    |                |                                            |                                           |
| C-1' (Gal)       | 101.43              | 100.31                 |             | 99.32                                     | 96.62                                     | 104.20                      |               |                    |                | 102.27                                     | 106.69                                    |
| C-2'             | 71.90 <sup>a</sup>  | 69.18                  |             | 69.37                                     | 67.99                                     | 71.40                       |               |                    |                | 72.33                                      | 73.59                                     |
| C-3'             | 73.30 <sup>a</sup>  | 71.07                  |             | 70.88                                     | 67.50                                     | 73.57                       |               |                    |                | 71.04                                      | 75.65                                     |
| C-4'             | 68.35, 68.32        | 67.17, 67.15           |             | 70.31                                     | 67.89                                     | 68.98                       |               |                    |                | 72.08                                      | 71.54                                     |
| C-5'             | 72.27, 72.25        | 70.69                  |             | 70.04                                     | 66.51                                     | 75.25                       |               |                    |                | 73.59                                      | 78.00                                     |
| C-6'             | 62.46, 62.42        | 61.27, 61.24           |             | 63.06                                     | 61.61                                     | 61.59                       |               |                    |                | 64.09                                      | 63.84                                     |
| OMe              |                     |                        |             |                                           |                                           |                             |               |                    |                | 57.88                                      | 60.02                                     |
| Ac (Me)          |                     | 20.83, 20.69,          |             |                                           | 20.70, 20.66                              |                             |               |                    |                |                                            |                                           |
|                  |                     | 20.61                  |             |                                           | 20.65, 20.62                              |                             |               |                    |                |                                            |                                           |
| Ac (C = O)       |                     | 170.36, 170.26,        |             |                                           | 170.42, 170.32                            |                             |               |                    |                |                                            |                                           |
|                  |                     | 169.50                 |             |                                           | 170.17, 169.95                            |                             |               |                    |                |                                            |                                           |
| C-1'' (C = O)    | 173.82 <sup>b</sup> | 173.32 <sup>c</sup>    |             | 173.59 <sup>d</sup> , 173.56 <sup>d</sup> | 173.27 <sup>e</sup> , 173.24 <sup>e</sup> | 174.33, 174.03 <sup>f</sup> | 179.82        |                    |                | 173.79, 173.43                             |                                           |
| C-2''            | 34.27 <sup>g</sup>  | 34.08 <sup>h</sup>     |             | 34.28                                     | 34.22 <sup>j</sup>                        | 34.48, 34.34                | 34.00         |                    |                | 34.33, 34.14                               |                                           |
| C-3''            | 24.98 <sup>k</sup>  | 24.86                  |             | 24.90                                     | 24.90                                     | 25.08                       | 24.69         |                    |                | 24.97, 24.92                               |                                           |
| C-4''-C-13''     | 29.77-29.18         | 29.79-29.12            |             | 29.78-29.11                               | 29.78-29.09                               | 29.88-29.29                 | 29.69-29.08   |                    |                | 29.72-29.12                                |                                           |
| C-14''           | 31.95               | 31.96                  |             | 31.94 <sup>l</sup>                        | 31.94 <sup>m</sup>                        | 32.11                       | 31.95         |                    |                | 31.95                                      |                                           |
| C-15''           | 22.70 <sup>n</sup>  | 22.70 <sup>o</sup>     |             | 22.70                                     | 22.70                                     | 22.86                       | 22.69         |                    |                | 22.71                                      |                                           |
| C-16''           | 14.13               | 14.12                  |             | 14.12                                     | 14.12                                     | 14.17                       | 14.12         |                    |                | 14.12                                      |                                           |
| C-1''' (C = O)   | 173.80 <sup>b</sup> | 173.29 <sup>c</sup>    |             | 173.26 <sup>d</sup>                       | 172.97 <sup>e</sup>                       |                             |               | 179.87             |                |                                            |                                           |
| C-2'''           | 34.24 <sup>e</sup>  | 34.05 <sup>h</sup>     |             | 34.10                                     | 34.05 <sup>j</sup>                        |                             |               | 34.01              |                |                                            |                                           |
| C-3'''           | 24.95 <sup>k</sup>  | 24.86                  |             | 24.90                                     | 24.90                                     |                             |               | 24.68              |                |                                            |                                           |
| C-4'''-C-15'''   | 29.77-29.18         | 29.79-29.12            |             | 29.78-29.11                               | 29.78-29.09                               |                             |               | 29.79-29.05        |                |                                            |                                           |
| C-16'''          | 31.95               | 31.96                  |             | 31.92 <sup>l</sup>                        | 31.92 <sup>m</sup>                        |                             |               | 31.92              |                |                                            |                                           |
| C-17'''          | 22.71 <sup>n</sup>  | 22.60 <sup>o</sup>     |             | 22.70                                     | 22.70                                     |                             |               | 22.69              |                |                                            |                                           |
| C-18'''          | 14.13               | 14.12                  |             | 14.12                                     | 14.12                                     |                             |               | 14.11              |                |                                            |                                           |
| C-9''' = C-10''' | 130.07, 129.70      | 130.03, 129.75         |             | 130.06, 129.70                            | 130.04, 129.71                            |                             |               | 130.04, 129.74     |                |                                            |                                           |
| C-8'''-C = C,    | 27.25 <sup>p</sup>  | 27.24                  |             | 27.24 <sup>q</sup>                        | 27.24 <sup>r</sup>                        |                             |               | 27.24 <sup>s</sup> |                |                                            |                                           |
| C-11'''-C = C    | 27.21 <sup>p</sup>  | 27.24                  |             | 27.20 <sup>q</sup>                        | 27.20 <sup>r</sup>                        |                             |               | 27.17 <sup>s</sup> |                |                                            |                                           |

|                          | BbGL-I | BbGL-I-Ac <sub>3</sub> | Cholesterol | BbGL-II | BbGL-II-Ac <sub>4</sub> | MGDG  | Palmitic acid | Oleic acid | 1,2-Dipalmitin | Me- $\alpha$ -D-Galp (in D <sub>2</sub> O) | Me- $\beta$ -D - Galp (in D <sub>2</sub> O) |
|--------------------------|--------|------------------------|-------------|---------|-------------------------|-------|---------------|------------|----------------|--------------------------------------------|---------------------------------------------|
| C-1 <sup>'''</sup> (Gro) |        |                        |             | 62.11   | 62.04                   | 63.04 |               |            | 62.02          |                                            |                                             |
| C-2 <sup>'''</sup>       |        |                        |             | 69.90   | 69.81                   | 70.58 |               |            | 72.16          |                                            |                                             |
| C-3 <sup>'''</sup>       |        |                        |             | 66.76   | 66.64                   | 68.06 |               |            | 61.62          |                                            |                                             |

BbGL-I, , *Borrelia burgdorferi* glycolipid I; BbGL-II, , *Borrelia burgdorferi* glycolipid II; MGDG, monogalactosyl diglyceride; Me- $\alpha$ -D-Galp, methyl  $\alpha$ -D-galactopyranoside; Me- $\beta$ -D-Galp, methyl  $\beta$ -D-galactopyranoside.

<sup>a-e</sup> Assignments interchangeable.

<sup>f</sup> The shifts in this group refer to stearoyl substituents, not to palmitoyl.

<sup>g-s</sup> Assignments interchangeable.
