# Supplementary material
Source: PubMed Central journal article supplement (PMC164687)

**(a)**

**CH**

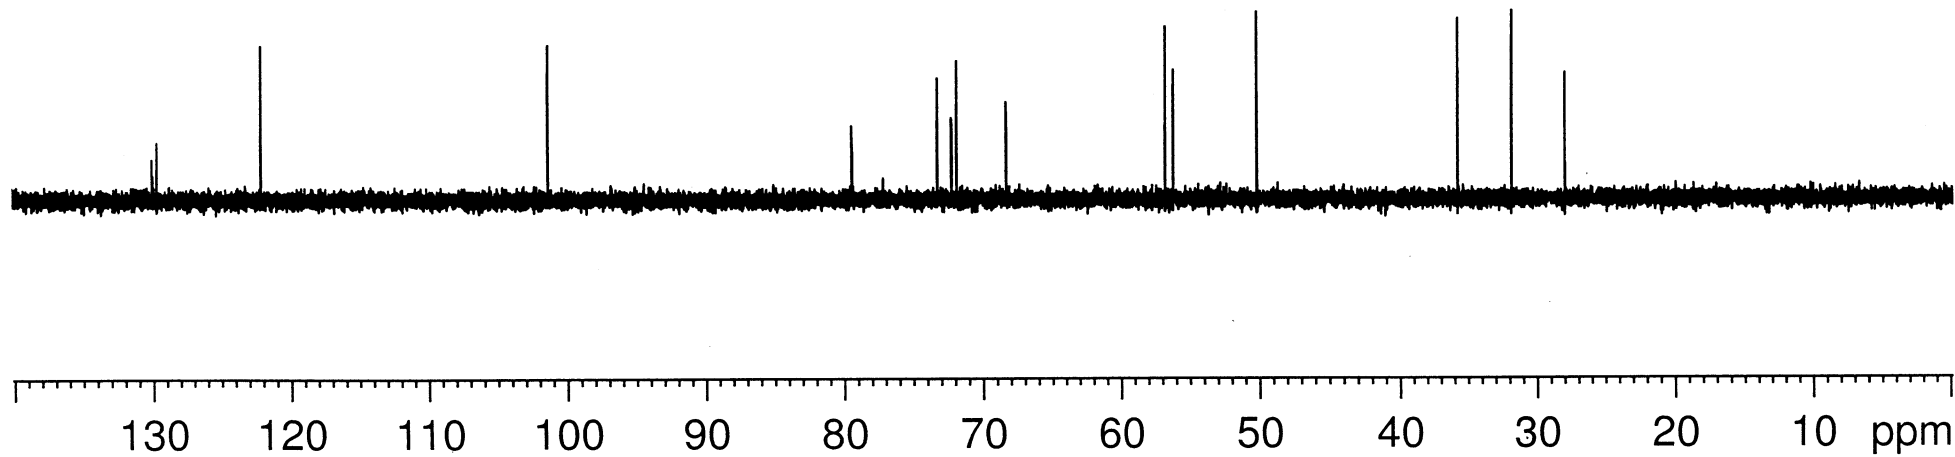

**CH<sub>3</sub>**

**(b)**

**CH<sub>2</sub>**

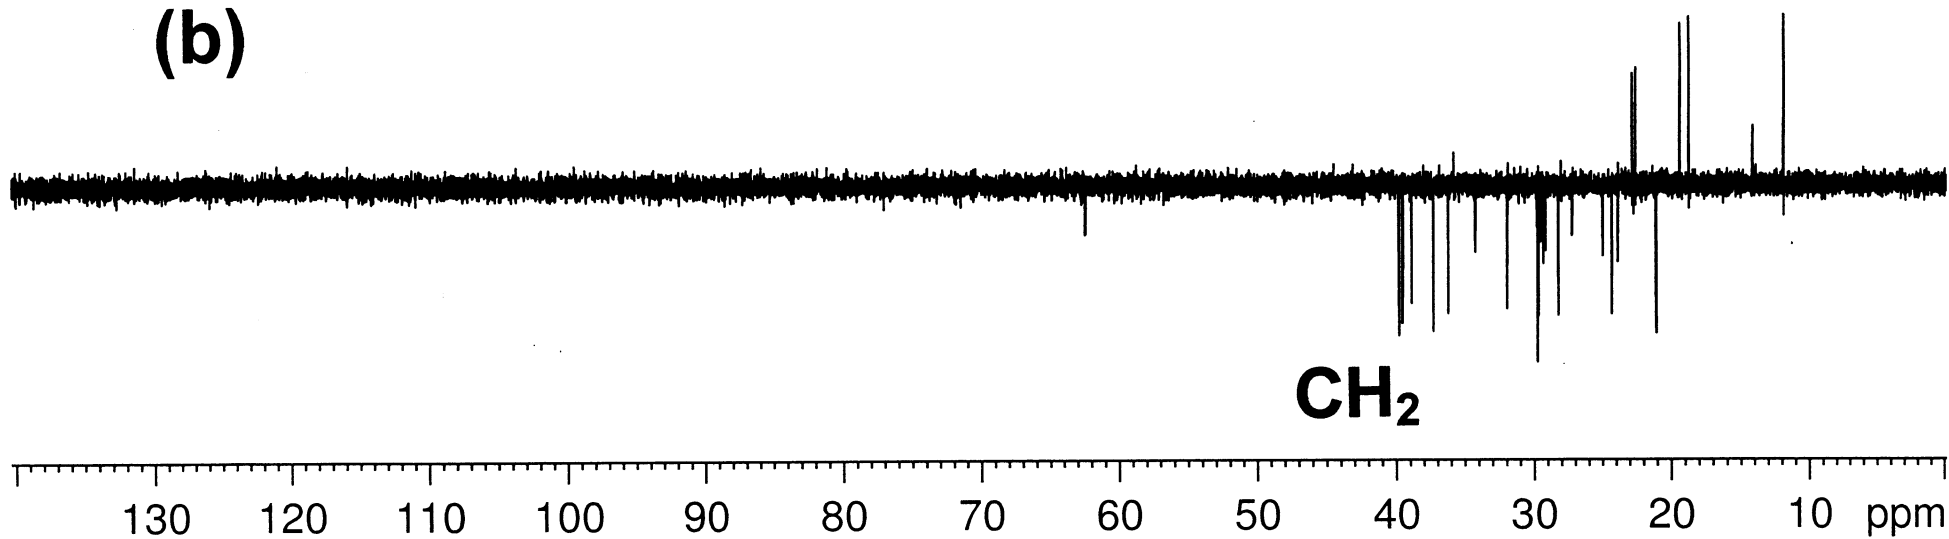

Supplement: pnas_1232451100_3.pdf [file pnas_1232451100_3.pdf]

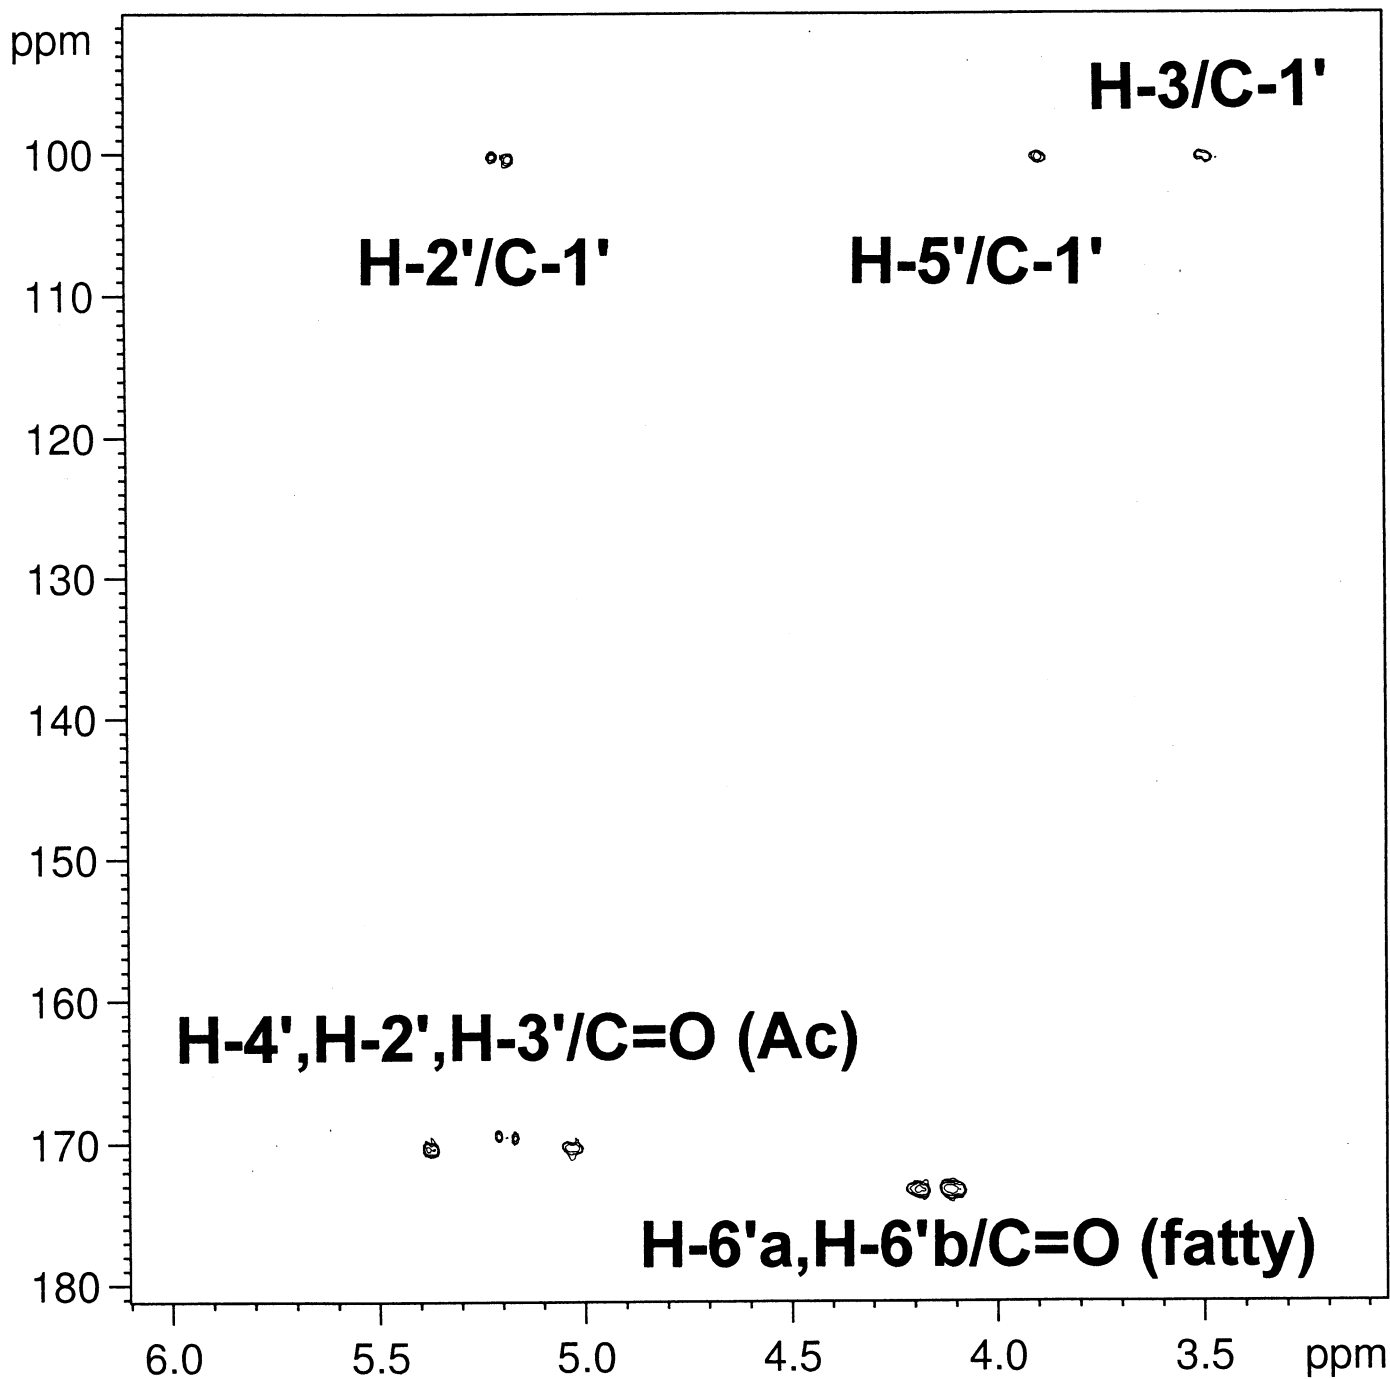

Supplement: pnas_1232451100_5.pdf [file pnas_1232451100_5.pdf]

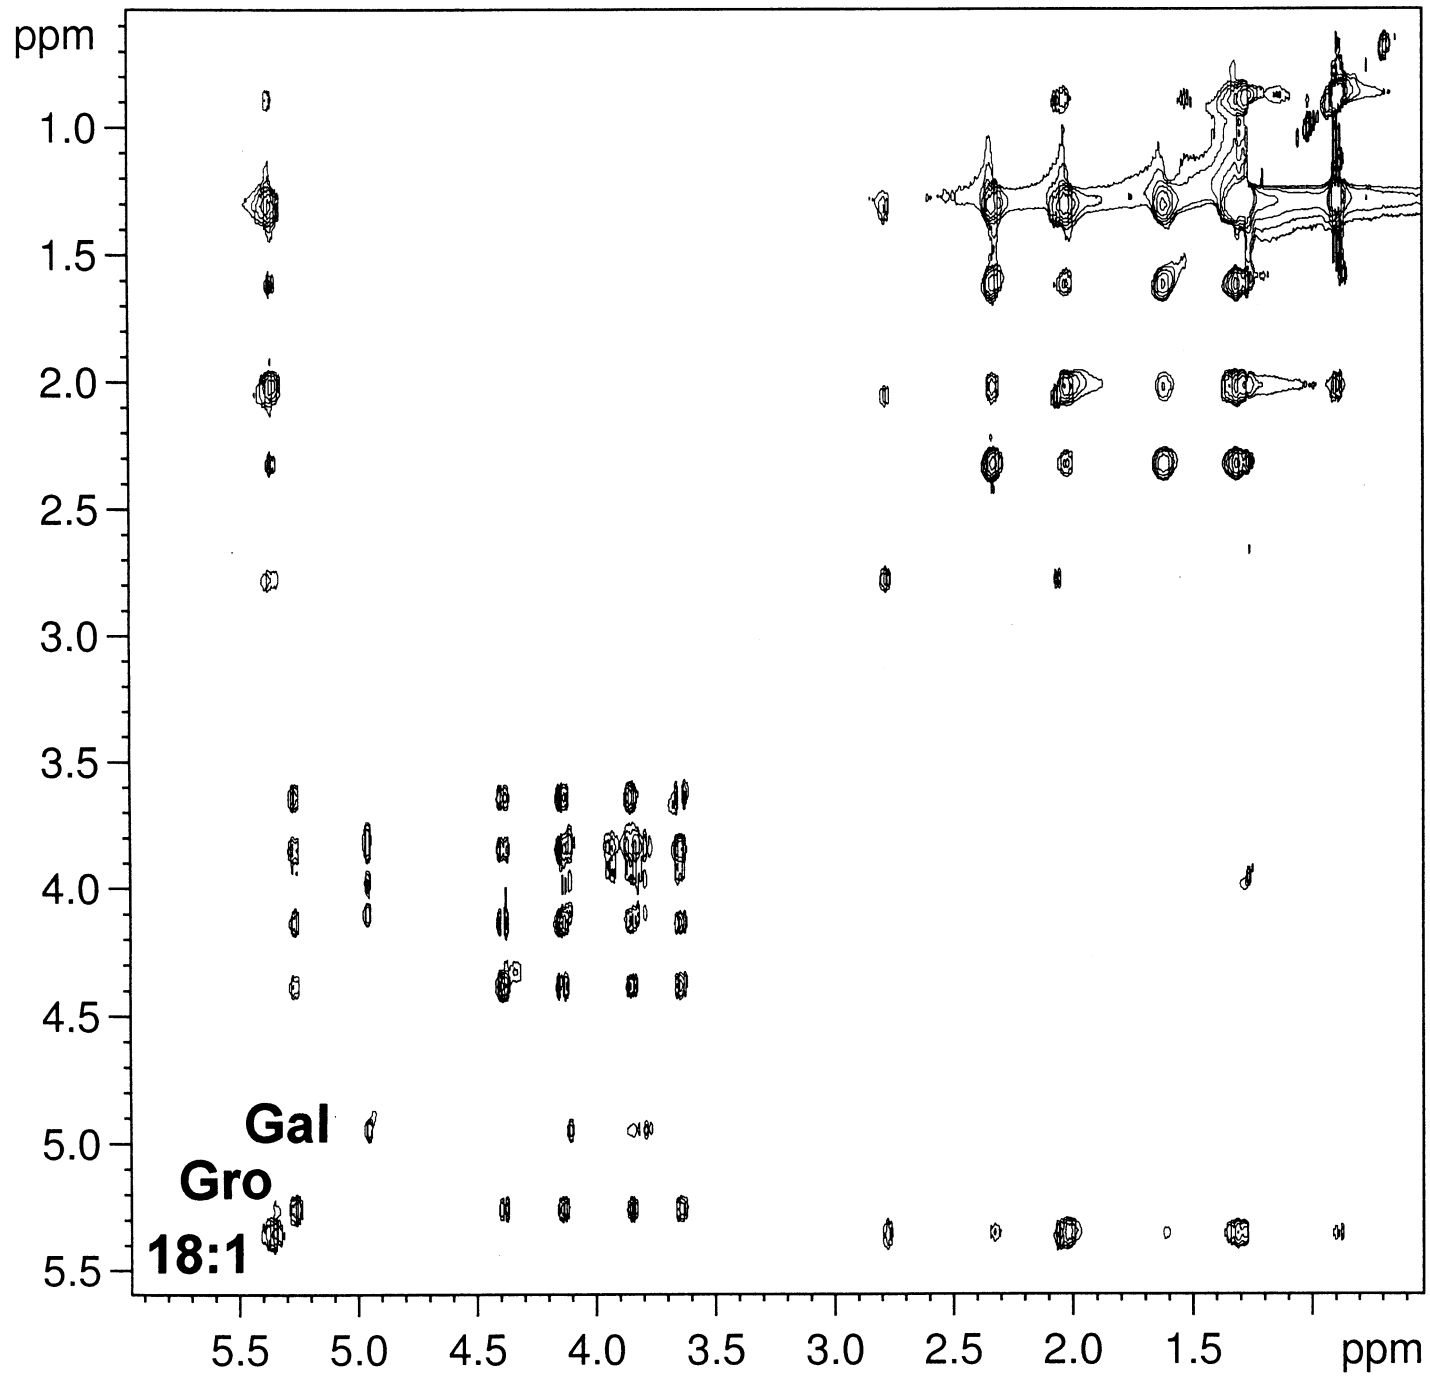

Supplement: pnas_1232451100_7.pdf [file pnas_1232451100_7.pdf]

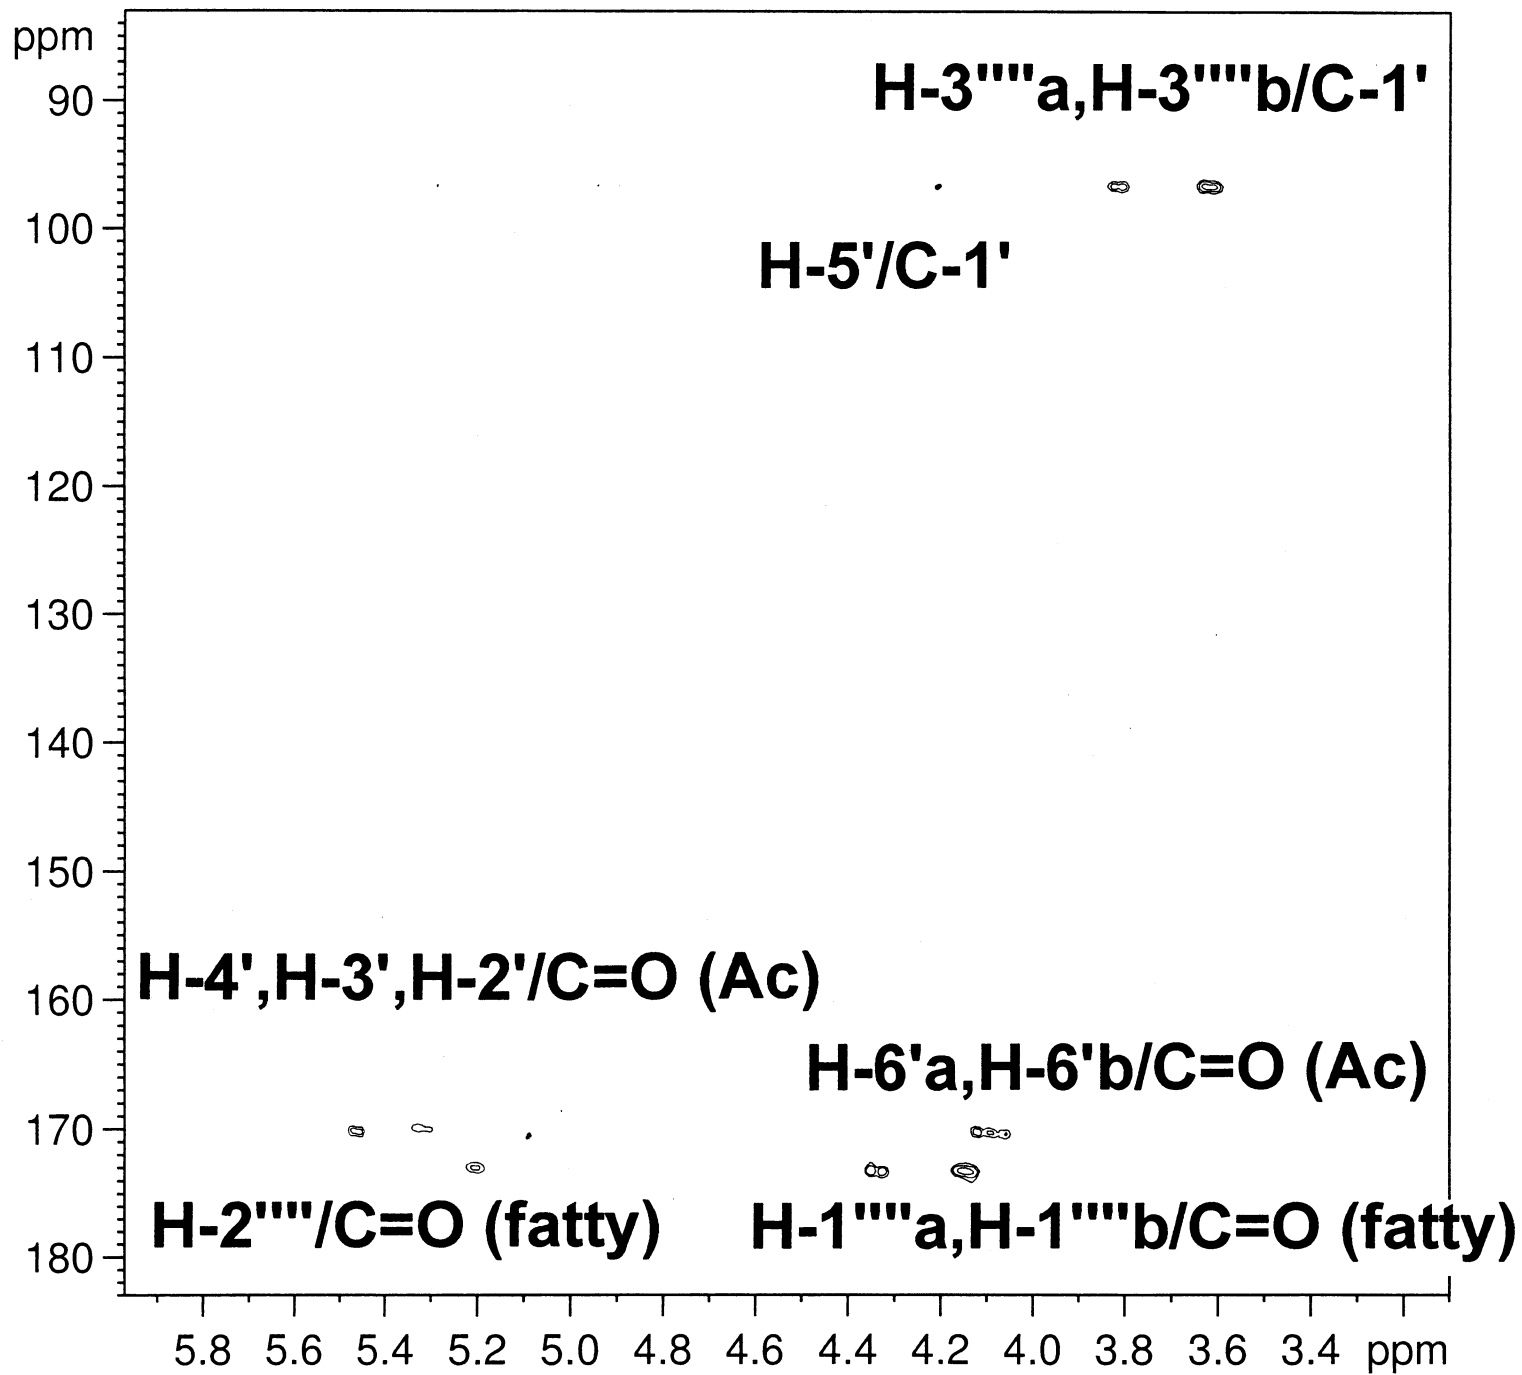

Supplement: pnas_1232451100_9.pdf [file pnas_1232451100_9.pdf]
